# Supplementary material for: Effect of caseinate glycation with oligochitosan and transglutaminase on the intestinal barrier function of the tryptic caseinate digest in IEC-6 cells
Source: Royal Society of Chemistry journal article supplement (doi:10.1039/c8fo01785a), 2019-01-01
Supplement: c8fo01785a1.pdf [file c8fo01785a1.pdf]

**Table S1** The transepithelial electrical resistance (TEER) values of IEC-6 cell monolayers with and without digest treatment at three time points.

| Samples    | Digest doses<br>( $\mu\text{g/mL}$ ) | TEER value ( $\Omega \text{ cm}^2$ ) |                     |                     |
|------------|--------------------------------------|--------------------------------------|---------------------|---------------------|
|            |                                      | 12 h                                 | 24 h                | 48 h                |
| Control    | 0                                    | $55.9 \pm 0.7^a$                     | $64.1 \pm 0.9^a$    | $71.1 \pm 1.3^a$    |
| CN digest  | 12.5                                 | $61.3 \pm 1.5^b$                     | $72.0 \pm 2.8^b$    | $82.3 \pm 1.0^b$    |
|            | 25                                   | $66.3 \pm 1.6^e$                     | $79.3 \pm 3.0^e$    | $90.8 \pm 1.3^e$    |
|            | 50                                   | $64.0 \pm 0.5^{cd}$                  | $76.3 \pm 3.5^{cd}$ | $86.8 \pm 1.3^{cd}$ |
|            | 100                                  | $62.8 \pm 0.4^{bc}$                  | $74.4 \pm 3.3^{bc}$ | $85.3 \pm 1.3^{bc}$ |
| GCN digest | 12.5                                 | $64.4 \pm 1.0^{cd}$                  | $76.9 \pm 3.0^{cd}$ | $87.7 \pm 1.0^{cd}$ |
|            | 25                                   | $70.4 \pm 0.9^f$                     | $84.0 \pm 3.1^f$    | $96.4 \pm 1.3^f$    |
|            | 50                                   | $66.8 \pm 0.8^e$                     | $80.1 \pm 2.6^e$    | $91.5 \pm 1.4^e$    |
|            | 100                                  | $65.3 \pm 0.7^{de}$                  | $78.1 \pm 2.9^{de}$ | $88.8 \pm 1.3^{de}$ |

Different lowercase letters after the values as the superscripts in same column indicate that one-way ANOVA of the mean values is different significantly ( $p < 0.05$ ).
